# Supplementary material for: Transcriptome Profiling of Pediatric Core Binding Factor AML
Source: PLoS One. 2015 Sep 23;10(9):e0138782. doi: 10.1371/journal.pone.0138782 (PMC4580636; doi:10.1371/journal.pone.0138782)
Supplement: S5 Table — (XLSX) [file pone.0138782.s007.xlsx]

## Sheet: Sheet1
Table S5. List of 69 Putative Fusion Events
Fusion	Type	ChimerDB hit	Strand	Location	# of Sample Hit
ADSL-SGSM3	Intra-chr		++	coding/utr5p	4
B3GNT5-KLHL24	Intra-chr		++	intron/utr5p	5
BCL2L2-PABPN1	Intra-chr		++	coding/coding	5
C6orf147-EIF3E	Inter-chr		-+	intron3/exon7	2
C6orf47-BAG6	Intra-chr		--	intron/utr5p	2
CBFB-MYH11	Intra-chr		+-	coding/coding	12
CHST11-UBC	Intra-chr		+-	coding/coding	3
CNPY3-GNMT	Intra-chr		++	coding/coding	2
CORO7-PAM16	Intra-chr		--	coding/coding	2
CSDA-CSDAP1	Inter-chr		--	intron4/exon1	2
CTBS-GNG5	Intra-chr		--	coding/coding	14
CXCR4-PTMA	Intra-chr		-+	coding/coding	2
CYTH1-USP36	Intra-chr		--	coding/utr5p	3
DDX5-EEF1A1	Inter-chr		--	coding/utr5p	4
DEF6-PPARD	Intra-chr		++	coding/intron	3
ECD-P4HA1	Intra-chr		--	coding/utr5p	4
EDF1-C9orf86	Intra-chr		-+	coding/coding	2
EIF2AK2-HEATR5B	Intra-chr		--	utr3p/utr5p	1
ELAVL1-TIMM44	Intra-chr		--	coding/coding	4
FAM117A-SLC35B1	Intra-chr		--	coding/coding	7
FAM175A-HELQ	Intra-chr		--	coding/coding	4
FAM60A-UBC	Intra-chr		--	utr5p/utr5p	3
GAPDH-HBB	Inter-chr		+-	exon7/exon3	2
GLYCTK-DNAH1	Intra-chr		++	coding/utr5p	4
HBA1-HBB	Inter-chr		+-	utr3p/utr5p	1
HBA2-HBB	Inter-chr		+-	coding/coding	4
HBB-HBA1	Inter-chr		-+	coding/coding	3
HBB-HBA2	Inter-chr		-+	coding/utr5p	4
HOXD13-NUP98	Inter-chr	Yes	+-	coding/intron	1
HSPE1-MOBKL3	Intra-chr		++	coding/coding	1
INPP5D-ATG16L1	Intra-chr		++	coding/coding	7
MATR3-PAIP2	Intra-chr		++	utr3p/utr5p	1
MBD1-CCDC11	Intra-chr		--	coding/coding	3
MED12-NLGN3	Intra-chr		++	coding/utr5p	4
MED22-SURF6	Intra-chr		--	coding/intron	4
MIR1204-PVT1	Intra-chr		++	exon1/exon3	2
MTRNR2L2-MTRNR2L1	Inter-chr		-+	exon1/exon1	7
NAIP-OCLN	Intra-chr		-+	coding/coding	11
NBPF14-NBPF1	Intra-chr	Yes	--	exon5/exon23	1
NCOR2-UBC	Intra-chr		--	exon8,8/exon1	1
NCRNA00189-BACH1	Intra-chr		++	intron/utr5p	1
NDE1-CBFB	Intra-chr		++	intron/intron	2
NDRG1-ST3GAL1	Intra-chr		--	coding/intron	4
NFATC3-PLA2G15	Intra-chr		++	coding/coding	4
NFE2L1-SNX11	Intra-chr		++	coding/utr5p	2
NSD1-NUP98	Inter-chr	Yes	+-	coding/coding	4
NUP98-HMGB3	Inter-chr		-+	coding/utr5p	1
NUP98-HOXD13	Inter-chr	Yes	-+	coding/intron	1
NUP98-NSD1	Inter-chr	Yes	-+	coding/coding	3
OAZ1-RNF126	Intra-chr		+-	exon1/exon5	2
OCLN-NAIP	Intra-chr	Yes	+-	coding/intron	1
PIM3-SCO2	Intra-chr		+-	coding/utr5p	3
PTP4A1-EEF1A1	Intra-chr		+-	utr5p/utr5p	3
QRICH1-IMPDH2	Intra-chr		--	utr3p/coding	4
RAI1-TOM1L2	Intra-chr		+-	coding/coding	2
RILPL2-SETD8	Intra-chr		-+	coding/downstream	10
RRM2-C2orf48	Intra-chr		++	coding/utr5p	5
RUNX1-RUNX1T1	Inter-chr	Yes	--	coding/coding	17
SIDT2-TAGLN	Intra-chr		++	coding/utr5p	10
ST6GALNAC4-ST6GALNAC6	Intra-chr		--	coding/coding	1
TAGLN2-CCDC19	Intra-chr		--	coding/coding	5
TAOK3-UBC	Intra-chr		--	exon21/exon1	1
TMED10P1-TMED10	Inter-chr		+-	exon1/exon4	9
TNFAIP8L2-SCNM1	Intra-chr		++	utr5p/coding	20
TREM1-TREML3	Intra-chr		--	coding/intron	2
TTTY15-USP9Y	Intra-chr		++	intron/utr5p	3
VAMP8-VAMP5	Intra-chr		++	utr3p/coding	22
ZNF92-ZNF254	Inter-chr		++	coding/intron	7
